# Supplementary material
Source: publisher figshare collection journal article supplement (https://frontiersin.figshare.com/ndownloader/files/24992210)
Supplement: Supplementary file [file 24992210]

**TABLE S1** | Changes on wet weight (BW, ww, g) and daily growth coefficient (DGC; %BW d<sup>-1</sup>) of *Octopus maya* juveniles exposed or not to the different substances (or cold sea water) and handling. Values as mean  $\pm$  SD (g). Different letters mean statistical differences between row data at  $p < 0.05$  level. SW: sea water (25°C, unless if specified); SW -H: sea water, without handling; SW +H: sea water, with handling (see text for details); EtOH: ethanol; MgCl<sub>2</sub>: magnesium chloride; Mix: ethanol in combination with magnesium chloride.

|                          | SW -H             | SW +H             | SW 11°C           | SW 13°C           | EtOH 0.5%         | EtOH 1.5%         | EtOH 3.0%         | MgCl <sub>2</sub> 0.75% | MgCl <sub>2</sub> 1.5% | MgCl <sub>2</sub> 3.75% | Mix 1.5:0.75%     | Mix 0.75:1.13%    | Mix 2.25:0.37%    | Clove oil         |
|--------------------------|-------------------|-------------------|-------------------|-------------------|-------------------|-------------------|-------------------|-------------------------|------------------------|-------------------------|-------------------|-------------------|-------------------|-------------------|
| Day 0                    |                   |                   |                   |                   |                   |                   |                   |                         |                        |                         |                   |                   |                   |                   |
| BW, ww, g                | 1.58 <sup>a</sup> | 1.44 <sup>a</sup> | 1.65 <sup>a</sup> | 1.50 <sup>a</sup> | 1.64 <sup>a</sup> | 1.64 <sup>a</sup> | 1.73 <sup>a</sup> | 1.73 <sup>a</sup>       | 1.52 <sup>a</sup>      | 1.67 <sup>a</sup>       | 1.62 <sup>a</sup> | 1.95 <sup>a</sup> | 2.06 <sup>a</sup> | 1.68 <sup>a</sup> |
| SD                       | 0.44              | 0.57              | 0.62              | 0.29              | 0.67              | 0.48              | 0.32              | 0.42                    | 0.30                   | 0.43                    | 0.26              | 0.47              | 0.67              | 0.84              |
| N                        | 7                 | 7                 | 7                 | 7                 | 7                 | 7                 | 7                 | 7                       | 7                      | 7                       | 7                 | 7                 | 7                 | 7                 |
| Day 10                   |                   |                   |                   |                   |                   |                   |                   |                         |                        |                         |                   |                   |                   |                   |
| BW, ww, g                | 2.23              | 2.13              | 2.19              | 2.06              | 2.21              | 2.18              | 2.16              | 2.31                    | 2.19                   | 2.40                    | 2.21              | 2.51              | 2.59              | 1.97              |
| SD                       | 0.78              | 0.62              | 0.77              | 0.36              | 0.78              | 0.91              | 0.57              | 0.53                    | 0.27                   | 0.62                    | 0.45              | 0.61              | 1.05              | 0.95              |
| N                        | 7                 | 7                 | 7                 | 7                 | 7                 | 7                 | 7                 | 7                       | 7                      | 7                       | 7                 | 7                 | 7                 | 7                 |
| Day 24                   |                   |                   |                   |                   |                   |                   |                   |                         |                        |                         |                   |                   |                   |                   |
| BW, ww, g                | 3.04              | 2.80              | 3.04              | 2.85              | 2.99              | 2.88              | 2.88              | 3.31                    | 3.07                   | 2.99                    | 3.05              | 3.18              | 3.57              | 1.76              |
| SD                       | 0.94              | 0.63              | 1.30              | 0.39              | 0.88              | 1.23              | 0.84              | 0.93                    | 0.44                   | 0.85                    | 0.54              | 0.74              | 1.24              | 0.66              |
| N                        | 7                 | 7                 | 7                 | 6                 | 7                 | 7                 | 7                 | 7                       | 7                      | 4                       | 6                 | 7                 | 7                 | 5                 |
| Day 38                   |                   |                   |                   |                   |                   |                   |                   |                         |                        |                         |                   |                   |                   |                   |
| BW, ww, g                | 5.23              | 4.67              | 4.63              | 5.03              | 4.15              | 4.48              | 4.32              | 4.84                    | 4.37                   | 5.07                    | 4.47              | 4.43              | 5.36              | 2.62              |
| SD                       | 1.18              | 1.22              | 1.77              | 0.89              | 1.24              | 2.10              | 1.63              | 1.46                    | 0.60                   | 1.10                    | 0.55              | 1.24              | 1.96              | 1.24              |
| N                        | 5                 | 7                 | 5                 | 6                 | 5                 | 6                 | 6                 | 7                       | 6                      | 4                       | 5                 | 7                 | 7                 | 5                 |
| Day 0 to 10              |                   |                   |                   |                   |                   |                   |                   |                         |                        |                         |                   |                   |                   |                   |
| DGC, %BW d <sup>-1</sup> | 3.47              | 3.89              | 2.80              | 3.18              | 3.00              | 2.84              | 2.26              | 2.87                    | 3.68                   | 3.66                    | 3.10              | 2.53              | 2.31              | 1.63              |
| SD                       | 1.22              | 1.37              | 1.48              | 1.25              | 0.72              | 1.35              | 1.44              | 0.95                    | 1.05                   | 1.43                    | 1.18              | 1.00              | 3.24              | 1.14              |
| N                        | 7                 | 7                 | 7                 | 7                 | 7                 | 7                 | 7                 | 7                       | 7                      | 7                       | 7                 | 7                 | 7                 | 7                 |
| Day 10 to 24             |                   |                   |                   |                   |                   |                   |                   |                         |                        |                         |                   |                   |                   |                   |
| DGC, %BW d <sup>-1</sup> | 2.22              | 1.96              | 2.36              | 2.31              | 2.17              | 2.01              | 2.06              | 2.56                    | 2.40                   | 1.57                    | 2.29              | 1.69              | 2.29              | -0.83             |
| SD                       | 0.98              | 0.87              | 1.02              | 3.05              | 0.74              | 0.53              | 1.56              | 0.87                    | 0.64                   | 5.18                    | 2.22              | 0.68              | 2.17              | 4.73              |
| N                        | 7                 | 7                 | 7                 | 7                 | 7                 | 7                 | 7                 | 7                       | 7                      | 7                       | 7                 | 7                 | 7                 | 7                 |
| Day 24 to 38             |                   |                   |                   |                   |                   |                   |                   |                         |                        |                         |                   |                   |                   |                   |
| DGC, %BW d <sup>-1</sup> | 3.87              | 3.65              | 3.00              | 4.06              | 2.33              | 3.15              | 2.89              | 2.72                    | 2.53                   | 3.77                    | 2.73              | 2.35              | 2.90              | 2.86              |
| SD                       | 0.97              | 0.92              | 2.32              | 0.72              | 0.52              | 1.05              | 0.39              | 0.32                    | 1.01                   | 5.48                    | 0.55              | 0.90              | 1.05              | 1.17              |
| N                        | 7                 | 7                 | 5                 | 6                 | 5                 | 6                 | 6                 | 7                       | 6                      | 4                       | 5                 | 7                 | 7                 | 5                 |
| Day 0 to 38              |                   |                   |                   |                   |                   |                   |                   |                         |                        |                         |                   |                   |                   |                   |
| DGC, %BW d <sup>-1</sup> | 3.15 <sup>b</sup> | 3.09 <sup>b</sup> | 2.71 <sup>b</sup> | 3.18 <sup>b</sup> | 2.45 <sup>b</sup> | 2.65 <sup>b</sup> | 2.41 <sup>b</sup> | 2.70 <sup>b</sup>       | 2.79 <sup>b</sup>      | 2.93 <sup>b</sup>       | 2.66 <sup>b</sup> | 2.15 <sup>b</sup> | 2.52 <sup>b</sup> | 1.18 <sup>a</sup> |
| SD                       | 0.49              | 0.48              | 1.11              | 0.58              | 0.62              | 0.72              | 0.68              | 0.41                    | 0.51                   | 0.22                    | 0.48              | 0.59              | 0.59              | 1.16              |
| N                        | 5                 | 7                 | 5                 | 6                 | 5                 | 6                 | 6                 | 7                       | 6                      | 4                       | 5                 | 7                 | 7                 | 5                 |
